# Supplementary material
Source: publisher figshare collection journal article supplement (https://tandf.figshare.com/ndownloader/files/35117921)
Supplement: Supplementary file 1 [file 35117921]

*Figure A1. Different centrality measures calculated for actors within the EU migration policy system.*


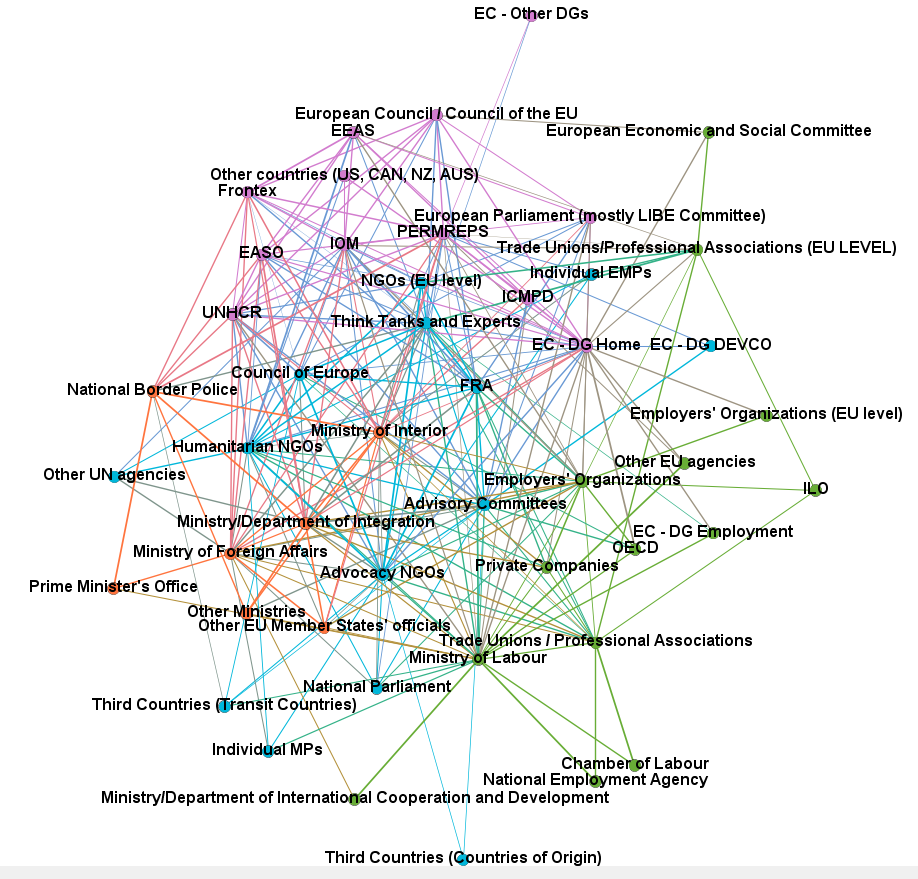
*Figure A2. Network representing the degree of framing consonance among actors within the EU migration policy system. Edges represent discussions among actors. The weight of edges is proportional to their degree of framing consonance. Colours identify clusters of actors sharing more similar perspectives/views.*

*Table A1 –List of Interviewees.*

| TYPE OF ACTOR | MIGRATION-RELATED COMPONENTS/ PORTFOLIOS (if >1) | NUMBER OF INTERVIEWEES | EU COUNTRIES |
| --- | --- | --- | --- |
| Advisory Committees |  | 2 | UK, NED |
| Advocacy NGOs (national level) |  | 2 | NED, SPA |
| Council of Europe |  | 1 |  |
| EC - DG Home | High-Skilled | 1 |  |
| Externalisation | 1 |  |
| Integration | 1 |  |
| Border Management | 1 |  |
| EEAS |  | 1 |  |
| Employers' Organizations |  | 2 | AUT, GER |
| European Council / Council of the EU |  | 1 |  |
| FRA |  | 1 |  |
| Humanitarian NGOs (national level) |  | 3 | SP, NED, AUT |
| IOM |  | 1 |  |
| Ministry/Department of International Cooperation and/or Development |  | 1 |  |
| Ministry of Foreign Affairs |  | 2 | GER, ITA |
| Ministry of Interior | Migration/Asylum | 2 | GER, AUT |
| Border Control | 2 | NED, UK |
| Ministry of Labour |  | 4 | AUT; GER; SP; ITA |
| Ministry/Department of Integration/ Naturalisation |  | 2 | GER; NED |
| National Border Police |  | 1 | SPA |
| NGOs (EU level) |  | 1 |  |
| PERMREP |  | 3 | UK, NED, AUT |
| Think Tanks and Experts (progressive) |  | 1 |  |
| Trade Unions / Professional Associations (national level) |  | 2 | AUT; GER |
| Trade Unions/Professional Associations (EU level) |  | 1 |  |
| UNHCR |  | 1 |  |
| TOTAL |  | 41 |

*Table A2. List of actors listed in the survey filled in by interviewees.*

| Advisory Committees; Advocacy NGOs (national level); Chamber of Labour; Council of Europe; EASO; EC (DG DEVCO); EC (DG Employment); EC (DG Home); EC (Other DGs); EEAS; Employers' Organizations (EU level); Employers' Organizations; European Council / Council of the EU; European Economic and Social Committee; European Parliament; FRA; Frontex; Humanitarian NGOs (national level); ICMPD; ICRC; ILO; Individual EMPs; Individual MPs; IOM; Ministry of Foreign Affairs; Ministry of Interior; Ministry of Labour; Ministry/Department of Integration/ Naturalisation; Ministry/Department of International Cooperation and/or Development; National Border Police; National Employment Agency; National Parliament; NGOs (EU level); OECD; Other EU agencies; Other EU Member States' officials; Other Ministries; Other UN agencies; PERMREP; Prime Minister's Office; Private Companies; Think Tanks and Experts; Third Countries (Countries of Origin); Third countries (EFTA Member States); Third Countries (Transit Countries); Third countries (US, CAN, NZ, AUS); Trade Unions / Professional Associations (national level); Trade Unions/Professional Associations (EU level); UNHCR. |
| --- |
